# Supplementary material for: Genetic variability and population structure of two sympatric cownose rays Rhinoptera (Myliobatiformes, Rhinopteridae) in the Western Atlantic Ocean
Source: PeerJ journal article supplement (doi:10.7717/peerj.17700), 2024-07-15
Supplement: SuppTables.xlsx [file SuppTables.xlsx]

## Sheet: Tables_Legends
Legends of Tables in Supplementary Material I
Table S1. List of the Genbank accesion number for samples used in this article.
Table S2. Genbank accesion number for samples generated in this article.
Table S3. Principal genetic indices for the each mitochondrial fragment. Number of individuals (N), polymorphic sites (S), number of haplotypes (H), haplotype diversity (hd), nucleotide diversity (π).
Table S4. (A) 17 benthic and surface oceanic variables dowloaded from Bio-ORACLE. (B) Spearman correlation values, the higher positive or negative correlation (-0.8≤ rho ≥0.8) and (C) uncorrelated variables used in this study
Table S5. Pairwise FST estimates between sample regions of Rhinoptera bonasus and R. brasiliensis. Analysis based on mitochondrial DNA COI and Cytb.
Table S6. Minimum (BTMIN) and maximum (BTMAX) benthic temperature difference in the R. bonasus and R. brasiliensis sampling sites. In bold, the sites with extreme changes in Temperature
Table S7. Neutrality est. Analysis based on mitochondrial DNA COI and Cytb

## Sheet: Table S1
Table S1. List of the Genbank accesion number for samples used in this article.
Accession Number	Species	Location	Autors
KF245598	Rhinoptera bonasus	Ingram Bay, Chesapeake Bay	Bade (2013)
KF245597	Rhinoptera bonasus	Ingram Bay, Chesapeake Bay
KF245596	Rhinoptera bonasus	Ingram Bay, Chesapeake Bay
MT455399	Rhinoptera bonasus	USA: Virginia, Northampton County, Lower Chesapeake Bay, York Spit Channel	Aguilar et al. (2020)
MT455227	Rhinoptera bonasus	USA: Maryland, Anne Arundel County, West River,Curtis Point
JX241049	Rhinoptera bonasus	Chesapeake Bay	Carney et al. (2017)
JX241050	Rhinoptera bonasus	Chesapeake Bay
JX241051	Rhinoptera bonasus	Chesapeake Bay
JX241052	Rhinoptera bonasus	Chesapeake Bay
JX241053	Rhinoptera bonasus	Chesapeake Bay
JX241054	Rhinoptera bonasus	Chesapeake Bay
JX241055	Rhinoptera bonasus	Chesapeake Bay
KM593339	Rhinoptera bonasus	Chesapeake Bay
KX151652	Rhinoptera bonasus		White et al. (2018)
MZ303836	Rhinoptera bonasus	municipio de Bragança (región costera del Amazonas)northeastern Pará	Martins et al. (2021)
MZ303835	Rhinoptera bonasus	municipio de Bragança (región costera del Amazonas)northeastern Pará
MZ303834	Rhinoptera bonasus	municipio de Bragança (región costera del Amazonas)northeastern Pará
MN105874	Rhinoptera bonasus	Brazilian Amazon coast Pará state (Vigia, Bragança, and Belém)	da Silva Rodrigues Filho et al. (2020)
MN105873	Rhinoptera bonasus	Brazilian Amazon coast Pará state (Vigia, Bragança, and Belém)
MN105872	Rhinoptera bonasus	Brazilian Amazon coast Pará state (Vigia, Bragança, and Belém)
MN105866	Rhinoptera bonasus	Brazilian Amazon coast Pará state (Vigia, Bragança, and Belém)
MN105865	Rhinoptera bonasus	Brazilian Amazon coast Pará state (Vigia, Bragança, and Belém)
MN105864	Rhinoptera bonasus	Brazilian Amazon coast Pará state (Vigia, Bragança, and Belém)
MN105863	Rhinoptera bonasus	Brazilian Amazon coast Pará state (Vigia, Bragança, and Belém)
MN105862	Rhinoptera bonasus	Brazilian Amazon coast Pará state (Vigia, Bragança, and Belém)
MN105861	Rhinoptera bonasus	Brazilian Amazon coast Pará state (Vigia, Bragança, and Belém)
MN105860	Rhinoptera bonasus	Brazilian Amazon coast Pará state (Vigia, Bragança, and Belém)
MN105859	Rhinoptera bonasus	Brazilian Amazon coast Pará state (Vigia, Bragança, and Belém)
MN105858	Rhinoptera bonasus	Brazilian Amazon coast Pará state (Vigia, Bragança, and Belém)
MN105757	Rhinoptera bonasus	Brazilian Amazon coast Pará state (Vigia, Bragança, and Belém)
MK085747	Rhinoptera bonasus	Southwest Atlantic: São Paulo	Ferrette et al. (2019)
MK085746	Rhinoptera bonasus	Southwest Atlantic: São Paulo
MK085607	Rhinoptera bonasus	Southwest Atlantic: São Paulo
MK085606	Rhinoptera bonasus	Southwest Atlantic: São Paulo
MK085603	Rhinoptera bonasus	Southwest Atlantic: São Paulo
MK085602	Rhinoptera bonasus	Southwest Atlantic: São Paulo
MK085600	Rhinoptera bonasus	Southwest Atlantic: São Paulo
MK085599	Rhinoptera bonasus	Southwest Atlantic: São Paulo
MK085598	Rhinoptera bonasus	Southwest Atlantic: São Paulo
MK085597	Rhinoptera bonasus	Southwest Atlantic: São Paulo
MK085553	Rhinoptera bonasus	Southwest Atlantic: São Paulo
MK085531	Rhinoptera bonasus	Southwest Atlantic: São Paulo
MK085529	Rhinoptera bonasus	Southwest Atlantic: São Paulo
MK085528	Rhinoptera bonasus	Southwest Atlantic:municipio de Bragança
KY671279	Rhinoptera bonasus	São Paulo State (Bertioga)	de Sousa Rangel et al. (2017)
KY671278	Rhinoptera bonasus	São Paulo State (Bertioga)
KY671277	Rhinoptera bonasus	São Paulo State (Bertioga)
KY671276	Rhinoptera bonasus	São Paulo State (Bertioga)
KY671275	Rhinoptera bonasus	São Paulo State (Bertioga)
KY671274	Rhinoptera bonasus	São Paulo State (Bertioga)
KY671273	Rhinoptera bonasus	São Paulo State (Bertioga)
KY671271	Rhinoptera bonasus	São Paulo State (Bertioga)
KY671270	Rhinoptera bonasus	São Paulo State (Bertioga)
MN883248	Rhinoptera brasiliensis	USA: Mississippi	Stoeckle et al. 2020
MN883247	Rhinoptera brasiliensis	USA: Mississippi
MZ303833	Rhinoptera brasiliensis	Amazon	da Silva Rodrigues Filho et al. (2020)
MZ303832	Rhinoptera brasiliensis	Amazon
MN105835	Rhinoptera brasiliensis	Pará state (Vigia, Bragança, and Belém)
MN105834	Rhinoptera brasiliensis	Pará state (Vigia, Bragança, and Belém)
MK085731.1	Rhinoptera brasiliensis	Southwest Atlantic: São Paulo	Ferrette et al. (2019)
MK085725.1	Rhinoptera brasiliensis	Southwest Atlantic: São Paulo
MK085724.1	Rhinoptera brasiliensis	Southwest Atlantic: São Paulo
MK085723.1	Rhinoptera brasiliensis	Southwest Atlantic: São Paulo
MK085722.1	Rhinoptera brasiliensis	Southwest Atlantic: São Paulo
MK085721.1	Rhinoptera brasiliensis	Southwest Atlantic: São Paulo
MK085697.1	Rhinoptera brasiliensis	Southwest Atlantic: São Paulo
MK085688.1	Rhinoptera brasiliensis	Southwest Atlantic: São Paulo
MK085614.1	Rhinoptera brasiliensis	Southwest Atlantic: São Paulo
MK085601.1	Rhinoptera brasiliensis	Southwest Atlantic: São Paulo
MK085589.1	Rhinoptera brasiliensis	Southwest Atlantic: São Paulo
MK085588.1	Rhinoptera brasiliensis	Southwest Atlantic: São Paulo
MK085587.1	Rhinoptera brasiliensis	Southwest Atlantic: São Paulo
MK085586.1	Rhinoptera brasiliensis	Southwest Atlantic: São Paulo
MK085552.1	Rhinoptera brasiliensis	Southwest Atlantic: São Paulo
MK085550.1	Rhinoptera brasiliensis	Southwest Atlantic: São Paulo
MK085549.1	Rhinoptera brasiliensis	Southwest Atlantic: São Paulo
MK085548.1	Rhinoptera brasiliensis	Southwest Atlantic: São Paulo
MK085548.1	Rhinoptera brasiliensis	Southwest Atlantic: São Paulo
MK085545.1	Rhinoptera brasiliensis	Southwest Atlantic: São Paulo
MK085544.1	Rhinoptera brasiliensis	Southwest Atlantic: São Paulo
MK085543.1	Rhinoptera brasiliensis	Southwest Atlantic: São Paulo
MK085542.1	Rhinoptera brasiliensis	Southwest Atlantic: São Paulo
MK085541.1	Rhinoptera brasiliensis	Southwest Atlantic: São Paulo
MK085540.1	Rhinoptera brasiliensis	Southwest Atlantic: São Paulo
MK085538.1	Rhinoptera brasiliensis	Southwest Atlantic: São Paulo
MK085537.1	Rhinoptera brasiliensis	Southwest Atlantic: São Paulo
MK085536.1	Rhinoptera brasiliensis	Southwest Atlantic: São Paulo
MK085535.1	Rhinoptera brasiliensis	Southwest Atlantic: São Paulo
MK085534.1	Rhinoptera brasiliensis	Southwest Atlantic: São Paulo
MK085533.1	Rhinoptera brasiliensis	Southwest Atlantic: São Paulo
MK085532.1	Rhinoptera brasiliensis	Southwest Atlantic: São Paulo
MK085530.1	Rhinoptera brasiliensis	Southwest Atlantic: São Paulo
MK085527.1	Rhinoptera brasiliensis	Southwest Atlantic: São Paulo
MK085526.1	Rhinoptera brasiliensis	Southwest Atlantic: São Paulo
MK085525.1	Rhinoptera brasiliensis	Southwest Atlantic: São Paulo
MK085524.1	Rhinoptera brasiliensis	Southwest Atlantic: São Paulo
MK085523.1	Rhinoptera brasiliensis	Southwest Atlantic: São Paulo
MK085522.1	Rhinoptera brasiliensis	Southwest Atlantic: São Paulo
KY671287.1	Rhinoptera brasiliensis	São Paulo State (Bertioga)	de Sousa Rangel et al. (2017)
KY671286.1	Rhinoptera brasiliensis	São Paulo State (Bertioga)
KY671285.1	Rhinoptera brasiliensis	São Paulo State (Bertioga)
KY671284.1	Rhinoptera brasiliensis	São Paulo State (Bertioga)
KY671283.1	Rhinoptera brasiliensis	São Paulo State (Bertioga)
KY671282.1	Rhinoptera brasiliensis	São Paulo State (Bertioga)
KY671281.1	Rhinoptera brasiliensis	São Paulo State (Bertioga)
KY671280.1	Rhinoptera brasiliensis	São Paulo State (Bertioga)
JX124888.1	Rhinoptera brasiliensis	Sao Paulo, Bacia Oceanica Santos	Ribeiro et al. (2012)

## Sheet: Table S2
Table S2. Genbank accesion number for samples generated in this article.
GenBank Accession Number	Specie	Gene	Haplotype	CC	IR	CH	TB	CK	AB	TT	TV	CV	CS	Q	Co	Br	Total
OR710910	Rhinoptera bonasus	COI	Hap 1	3	4	0	17	0	4	0	0	0	0	0	0	0	28
OR710911	Rhinoptera bonasus	COI	Hap 2	0	8	0	4	0	4	0	0	0	0	0	0	0	16
OR710912	Rhinoptera bonasus	COI	Hap 3	0	0	0	0	0	0	0	0	0	0	0	0	10	10
OR710913	Rhinoptera bonasus	COI	Hap 4	2	1	0	0	0	0	0	0	0	0	0	0	0	3
OR710914	Rhinoptera bonasus	COI	Hap 5	0	0	0	0	0	0	0	0	0	0	0	11	0	11
OR710915	Rhinoptera bonasus	COI	Hap 6	0	0	0	0	0	0	0	0	0	0	0	2	0	2
OR710916	Rhinoptera bonasus	COI	Hap 7	1	0	0	0	11	0	0	0	0	0	0	0	0	12
OR710917	Rhinoptera brasiliensis	COI	Hap 1	10	0	0	0	0	0	2	4	14	18	4	2	0	54
OR710918	Rhinoptera brasiliensis	COI	Hap 2	0	0	0	1	0	0	0	3	15	13	5	0	0	37
OR710919	Rhinoptera brasiliensis	COI	Hap 3	0	0	0	0	0	0	0	1	0	0	0	0	0	1
OR710920	Rhinoptera brasiliensis	COI	Hap 4	0	0	0	0	0	0	0	0	0	0	0	0	8	8
OR710921	Rhinoptera brasiliensis	COI	Hap 5	0	0	0	0	0	0	0	0	0	0	0	0	2	2
OR710922	Rhinoptera brasiliensis	COI	Hap 6	0	0	0	0	0	0	0	0	0	1	0	0	0	1

## Sheet: Table S3
Table S3. Principal genetic indices for the each mitochondrial fragment by locality sampled. Number of individuals (N), polymorphic sites (S), number of haplotypes (H), haplotype diversity (hd), nucleotide diversity (π), and standard deviation (±sd).
R. bonasus		COI							Cytb
Locality	Code	N	S	H	hd ± sd	π ± sd	Locality	Code	N	S	H	hd ± sd	π ± sd
	Group 1	41	0	1	0.000±0.000	0.0000±0.000		Group 1	23	2	3	0.423±0.104	0.00105±0.00028
Chesapeake Bay	BCh1	2	0	1	0.000±0.000	0.0000±0.000	Chesapeake Bay	BCh1	4	1	2	0.667±0.204	0.00158±0.00048
Indian River Lagoon	IR1	1					Indian River Lagoon	IR1	9	1	2	0.222±0.166	0.00053±0.00039
Charlotte Harbor	CH1	7	0	1	0.000±0.000	0.0000±0.000	Charlotte Harbor	CH1	2	0	1	0.000±0.000	0.0000±0.000
Tampa Bay	TB1	1					Tampa Bay	TB1	4	0	1	0.000±0.000	0.0000±0.000
Cedar Key	CK1	27	0	1	0.000±0.000	0.0000±0.000	Apalachicola Bay	AB1	5	3	3	0.700±0.218	0.00284±0.00115
Apalachicola Bay	AB1	3	0	1	0.000±0.000	0.0000±0.000		Group 2	44	2	3	0.132±0.068	0.00032±0.00017
	Group 2	86	2	2	0.023±0.023	0.00009±0.00009	Chesapeake Bay	BCh2	1
Chesapeake Bay	BCh2	1					Indian River Lagoon	IR2	4	1	2	0.667±0.204	0.00158±0.00048
Indian River Lagoon	IR2	7	2	2	0.286±0.196	0.00111±0.00076	Charlotte Harbor	CH2	4	0	1	0.000±0.000	0.0000±0.000
Charlotte Harbor	CH2	25	0	1	0.000±0.000	0.0000±0.000	Tampa Bay	TB2	17	0	1	0.000±0.000	0.0000±0.000
Tampa Bay	TB2	21	0	1	0.000±0.000	0.0000±0.000	Cedar Key	CK2	14	1	2	0.143±0.119	0.00034±0.00028
Cedar Key	CK2	23	0	1	0.000±0.000	0.0000±0.000	Apalachicola Bay	AB2	3	0	1	0.000±0.000	0.0000±0.000
Apalachicola Bay	AB2	9	0	1	0.000±0.000	0.0000±0.000		Group 3	41	4	6	0.312±0.092	0.00090±0.00030
	Group 3	41	2	4	0.338±0.086	0.00075±0.00021	Manaure, Colombia	Co	13	3	5	0.692±0.119	0.00224±0.00057
Chesapeake Bay	BCh3	6	1	2	0.333±0.215	0.00065±0.00042	Sao Paulo, Brazil	SP	28	1	2	0.071±0.065	0.00017±0.00015
Indian River Lagoon	IR3	11	1	2	0.182±0.144	0.00035±0.00028		All	108	11	12	0.735±0.026	0.00836±0.00030
Charlotte Harbor	CH3	4	1	2	0.667±0.204	0.00129±0.00040
Tampa Bay	TB3	5	0	1	0.000±0.000	0.0000±0.000
Cedar Key	CK3	11	2	4	0.600±0.154	0.00148±0.00044
Apalachicola Bay	AB3	4	0	1	0.000±0.000	0.0000±0.000
	Group 4	29	5	4	0.259±0.104	0.00079±0.00036
Manaure, Colombia	Co	13	1	2	0.282±0.142	0.00055±0.00028
Pará, Brazil	PA1	14	4	3	0.275±0.148	0.00111±0.00063
Sao Paulo, Brazil	SP1	2	0	1	0.000±0.000	0.0000±0.000
	Group 5	33	0	1	0.000±0.000	0.0000±0.000
Pará, Brazil	PA2	2	0	1	0.000±0.000	0.0000±0.000
Sao Paulo, Brazil	SP2	31	0	1	0.000±0.000	0.0000±0.000
	All	230	19	11	0.780±0.016	0.01049±0.00058
R. brasiliensis		COI							Cytb
Locality	Code	N	S	H	hd ± sd	π ± sd	Locality	Code	N	S	H	hd ± sd	π ± sd
	Group 1	115	0	1	0.000±0.000	0.0006±0.000		Group 1	80	0	1	0.000±0.000	0.0000±0.000
Cape Canaveral	CC	10	0	1	0.000±0.000	0.0006±0.000	Cape Canaveral	CC1	7	0	1	0.000±0.000	0.0000±0.000
Indian River Lagoon	IR1	4	0	1	0.000±0.000	0.0000±0.000	Indian River Lagoon	IR1	2	0	1	0.000±0.000	0.0000±0.000
Cedar Key	CK	1					Tamihaua, Mexico	TV1	8	0	1	0.000±0.000	0.0000±0.000
Tampico Mexico	TT	2	0	1	0.000±0.000	0.0000±0.000	Chachalacas, Mexico	CV1	29	0	1	0.000±0.000	0.0000±0.000
Tamihaua, Mexico	TV1	4	0	1	0.000±0.000	0.0000±0.000	Seybaplaya, Mexico	CS1	18	0	1	0.000±0.000	0.0000±0.000
Chachalacas, Mexico	CV1	14	0	1	0.000±0.000	0.0000±0.000	Chiquila, Mexico	Q1	8	0	1	0.000±0.000	0.0000±0.000
Seybaplaya, Mexico	CS1	18	0	1	0.000±0.000	0.0000±0.000	Cienaga, Colombia	Co	1
Chiquila, Mexico	Q1	4	0	1	0.000±0.000	0.0000±0.000	Sao Paulo, Brazil	SP1	7	0	1	0.000±0.000	0.0000±0.000
Cienaga, Colombia	Co	2	0	1	0.000±0.000	0.0000±0.000		Group 2	15	1	2	0.248±0.131	0.00059±0.00031
Pará, Brazil	PA1	7	0	1	0.000±0.000	0.0000±0.000	Cape Canaveral	CC2	3	1	2	0.667±0.314	0.00158±0.00074
Sao Paulo, Brazil	SP1	49	0	1	0.000±0.000	0.0000±0.000	Seybaplaya, Mexico	CS2	11	1	2	0.182±0.144	0.00043±0.00034
	Group 2	53	2	3	0.075±0.049	0.00014±0.00010	Chiquila, Mexico	Q2	1
Indian River Lagoon	IR2	9	0	1	0.000±0.000	0.0000±0.000		Group 3	7	1	2	0.286±0.196	0.00068±0.00046
Tampa Bay	TB	1					Cape Canaveral	CC3	1
Mississipi	MM	2	0	1	0.000±0.000	0.0000±0.000	Tampico Mexico	TT	2	1	2	1.000±0.500	0.00236±0.00118
Tamihaua, Mexico	TV2	4	1	2	0.500±0.265	0.00096±0.00051	Chachalacas, Mexico	CV3	1
Chachalacas, Mexico	CV2	15	0	1	0.000±0.000	0.0000±0.000	Seybaplaya, Mexico	CS3	3	0	1	0.000±0.000	0.0000±0.000
Seybaplaya, Mexico	CS2	14	1	2	0.143±0.119	0.00027±0.00023		Group 4	2	1	2	1.000±0.500	0.00236±0.00118
Chiquila, Mexico	Q2	5	0	1	0.000±0.000	0.0000±0.000	Tampa Bay	TB	1
Pará, Brazil	PA2	3	0	1	0.000±0.000	0.0000±0.000	Seybaplaya, Mexico	CS4	1
	Group 3							Group 5
Pará, Brazil	PA3	4	0	1	0.000±0.000	0.0000±0.000	Sao Paulo, Brazil	SP2	3	2	2	0.667±0.314	0.00315±0.00149
	Group 4							All	107	6	8	0.404±0.057	0.00114±0.00018
Sao Paulo, Brazil	SP2	4	4	4	1.000±0.177	0.00382±0.00068
	Group 5
Sao Paulo, Brazil	SP3	5	0	1	0.000±0.000	0.0000±0.000
	All	181	8	10	0.518±0.031	0.00111±0.00009

## Sheet: Table S4
Table S4. (A) 17 benthic and surface oceanic variables dowloaded from Bio-ORACLE. (B) Spearman correlation values, the higher positive or negative correlation (-0.8≤ rho ≥0.8) and (C) uncorrelated variables used in this study
(A)						(B)
Depht of layers	Value	Variable	Units	Code			BTMIN	BTMAX	BSMIN	BSMAX	BOMIN	BOMAX	BCVMIN	BCVMAX	STMIN	STMAX	SSMIN	SSMAX	SDOMIN	SDOMAX	SCVMIN	SCVMAX	BAT
Benthic	Minimum	Temperature	ºC	BTMIN		BTMIN	1	-0.207989	0.732094	0.871212	0.0819559	-0.788567	0.792011	0.662534	0.836777	-0.18595	0.475207	0.573691	-0.0337466	-0.805785	0.533747	0.522727	-0.464793
	Maximum			BTMAX		BTMAX	-0.207989	1	-0.52135	-0.329201	-0.631543	0.402204	-0.202479	-0.0964187	-0.455923	0.879477	0.190771	0.123278	-0.800275	0.444215	-0.460744	-0.49449	0.356938
	Minimum	Salinity	PSS	BSMIN		BSMIN	0.732094	-0.52135	1	0.880165	0.144628	-0.730028	0.486915	0.357438	0.807163	-0.448347	0.496556	0.545455	0.256198	-0.802342	0.471074	0.484848	-0.615157
	Maximum			BSMAX		BSMAX	0.871212	-0.329201	0.880165	1	0.000688705	-0.741047	0.582645	0.455923	0.836777	-0.295455	0.4573	0.65978	0.0309917	-0.773416	0.462121	0.477961	-0.654153
	Minimum	Dissolved molecular oxygen	mol.m-3	BOMIN		BOMIN	0.0819559	-0.631543	0.144628	0.000688705	1	0.128099	0.331267	0.205923	-0.0475207	-0.727273	-0.210744	-0.476584	0.835399	0.0764463	0.267906	0.199036	-0.226951
	Maximum			BOMAX		BOMAX	-0.788567	0.402204	-0.730028	-0.741047	0.128099	1	-0.557163	-0.5427	-0.962121	0.211433	-0.310606	-0.602617	-0.0385675	0.980716	-0.666667	-0.714187	0.432823
	Minimum	Currents velocity	m.s-1	BCVMIN		BCVMIN	0.792011	-0.202479	0.486915	0.582645	0.331267	-0.557163	1	0.676309	0.609504	-0.151515	0.0798898	0.21281	0.261708	-0.600551	0.566804	0.538567	-0.428256
	Maximum			BCVMAX		BCVMAX	0.662534	-0.0964187	0.357438	0.455923	0.205923	-0.5427	0.676309	1	0.496556	-0.212121	0.101928	0.00619835	0.142562	-0.527548	0.735537	0.74449	-0.293701
Surface	Minimum	Temperature	ºC	STMIN		STMIN	0.836777	-0.455923	0.807163	0.836777	-0.0475207	-0.962121	0.609504	0.496556	1	-0.293388	0.342975	0.623967	0.0695592	-0.97314	0.692149	0.72314	-0.595483
	Maximum			STMAX		STMAX	-0.18595	0.879477	-0.448347	-0.295455	-0.727273	0.211433	-0.151515	-0.212121	-0.293388	1	0.155647	0.294077	-0.756887	0.25551	-0.44146	-0.43595	0.345345
	Minimum	Salinity	PSS	SSMIN		SSMIN	0.475207	0.190771	0.496556	0.4573	-0.210744	-0.310606	0.0798898	0.101928	0.342975	0.155647	1	0.645317	-0.369835	-0.347107	-0.0626722	-0.0378788	-0.247327
	Maximum			SSMAX		SSMAX	0.573691	0.123278	0.545455	0.65978	-0.476584	-0.602617	0.21281	0.00619835	0.623967	0.294077	0.645317	1	-0.4573	-0.567493	0.0337466	0.0426997	-0.419824
	Minimum	Dissolved molecular oxygen	mol.m-3	SDOMIN		SDOMIN	-0.0337466	-0.800275	0.256198	0.0309917	0.835399	-0.0385675	0.261708	0.142562	0.0695592	-0.756887	-0.369835	-0.4573	1	-0.0881543	0.336777	0.356749	-0.269812
	Maximum			SDOMAX		SDOMAX	-0.805785	0.444215	-0.802342	-0.773416	0.0764463	0.980716	-0.600551	-0.527548	-0.97314	0.25551	-0.347107	-0.567493	-0.0881543	1	-0.674931	-0.722452	0.458469
	Minimum	Currents velocity	m.s-1	SCVMIN		SCVMIN	0.533747	-0.460744	0.471074	0.462121	0.267906	-0.666667	0.566804	0.735537	0.692149	-0.44146	-0.0626722	0.0337466	0.336777	-0.674931	1	0.956612	-0.598645
	Maximum			SCVMAX		SCVMAX	0.522727	-0.49449	0.484848	0.477961	0.199036	-0.714187	0.538567	0.74449	0.72314	-0.43595	-0.0378788	0.0426997	0.356749	-0.722452	0.956612	1	-0.569134
-	-	Bathymetry	m	BAT		BAT	-0.464793	0.356938	-0.615157	-0.654153	-0.226951	0.432823	-0.428256	-0.293701	-0.595483	0.345345	-0.247327	-0.419824	-0.269812	0.458469	-0.598645	-0.569134	1
						(C)
							BTMIN	BOMIN	BCVMIN	BTMAX	BCVMAX	SSMIN	SSMAX	SCVMAX	BAT
						BTMIN	1	0.0819559	0.792011	-0.207989	0.662534	0.475207	0.573691	0.522727	-0.464793
						BOMIN	0.0819559	1	0.331267	-0.631543	0.205923	-0.210744	-0.476584	0.199036	-0.226951
						BCVMIN	0.792011	0.331267	1	-0.202479	0.676309	0.0798898	0.21281	0.538567	-0.428256
						BTMAX	-0.207989	-0.631543	-0.202479	1	-0.0964187	0.190771	0.123278	-0.49449	0.356938
						BCVMAX	0.662534	0.205923	0.676309	-0.0964187	1	0.101928	0.00619835	0.74449	-0.293701
						SSMIN	0.475207	-0.210744	0.0798898	0.190771	0.101928	1	0.645317	-0.0378788	-0.247327
						SSMAX	0.573691	-0.476584	0.21281	0.123278	0.00619835	0.645317	1	0.0426997	-0.419824
						SCVMAX	0.522727	0.199036	0.538567	-0.49449	0.74449	-0.0378788	0.0426997	1	-0.569134
						BAT	-0.464793	-0.226951	-0.428256	0.356938	-0.293701	-0.247327	-0.419824	-0.569134	1

## Sheet: Table S5
Table S5. Pairwise FST estimates between sample regions of Rhinoptera bonasus and R. brasiliensis. Analysis based on mitochondrial DNA COI and Cytb.
R. bonasus		CTNA	WTNA	TNA	NBS	WTSA
COI	CTNA		0.02247	0.00634	0	0
	WTNA	0.1396		0.0001	0	0
	TNA	0.17776	0.48161		0	0
	NBS	0.45287	0.4417	0.00625		0
	WTSA	0.72634	0.54872	0.82264	0.71816
Cytb	CTNA		0.01366	0.21889		0.0001
	WTNA	0.32		0.01465		0
	TNA	0.03921	0.0794			0
	WTSA	0.79098	0.78147	0.46929
R.brasiliensis		WTNA	TNA	NBS	WTSA
COI	WTNA		0.624	0.39941	0.0019
	TNA	-0.08124		0.0468	0
	NBS	0.03105	0.07704		0
	WTSA	0.50832	0.23981	0.23977
Cytb	TNA				0.15989
	WTSA	0.03591
Note	Pairwise FST values (below diagonal) and P values (above diagonal). Values in bold indicate significant values (p < 0.05).
	cold temperate Northwest Atlantic [CTNA]
	warm temperate Northwest Atlantic [WTNA]
	tropical Northwestern Atlantic [TNA]
	North Brazil Shelf [NBS]
	warm temperate Southwestern Atlantic [WTSA]

## Sheet: Table S6
Table S6. Minimum (BTMIN) and maximum (BTMAX) benthic temperature difference in the R. bonasus and R. brasiliensis sampling sites. In bold, the sites with extreme changes in Temperature
Locality	Code	BTMIN (°C)	BTMAX (°C)	Temperature Difference (°C)
Apalachicola Bay	AB	15.7716	30.4147	14.6431
Cape Canaveral	CC	21.4259	28.9055	7.47955
Cedar Key	CK	14.9267	31.0336	16.107
Chachalacas	SV	22.5176	29.9036	7.38594
Charlotte Harbor	CH	17.1998	30.9316	13.7318
Chesapeake Bay	BCh	3.24814	27.8325	24.5844
Chiquila	Q	25.1436	29.472	4.32834
Colombia	Co	4.42041	4.66109	0.24068
Indian River Lagoon	IR	21.5899	29.8379	8.24797
Mississipi	MM	14.5065	30.8556	16.3491
Pare, Brazil	Pa	27.3649	29.7182	2.3533
Sao Paulo, Brazil	SP	16.7953	26.1767	9.38141
Seybaplaya	Cm	22.6202	30.1801	7.55991
Tamiahua	TV	22.0511	29.8628	7.81173
Tampa Bay	TB	16.0599	30.9527	14.8928
Tampico	Tt	21.6043	29.7819	8.17755

## Sheet: Table S7
Table S7. Neutrality est. Analysis based on mitochondrial DNA COI and Cytb
	Group AMOVA	Tajima’s D (P value)	Fu’s Fs (P value)	R2 (P value)	r (P value)
Rhinoptera bonasus
COI	CTNA	1.178 (0.855)	-0.285 (0.316)	0.259 (0.878)	0.143 (0.318)
	WTNA	0.775 (0.808)	-0.264 (0.430)	0.139 (0.786)	0.059 (0.078)
	TNA	0.788 (0.820)	4.744 (0.931)	0.125 (0.839)	0.099 (0.710)
	NBS	-1.593 (0.043)	-0.335 (0.360)	0.116 (0.138)	0.635 (0.923)
	WTSA	-1.042 (0.189)	0.400 (0.335)	0.058 (0.000)	0.806 (0.995)
	All samples	1.645 (0.944)	4.508 (0.873)	0.141 (0.976)	0.047 (0.623)
CYTB	CTNA	0.243 (0.731)	-0.475 (0.186)	0.250 (0.341)	0.360 (0.608)
	WTNA	-0.747 (0.281)	-0.406 (0.334)	0.106 (0.143)	0.308 (0.685)
	TNA	1.274 (0.906)	0.709 (0.653)	0.159 (0.932)	0.075 (0.520)
	WTSA	-1.151 (0.120)	-1.154 (0.060)	0.159 (0.932)	0.159 (0.932)
	All samples	1.757 (0.959)	0.083 (0.571)	0.159 (0.586)	0.127 (0.845)
Rhinoptera brasiliensis
COI	WTNA	0.000 (1.000)	0.200 (0.392)	0.471 (1.000)	0.555 (0.605)
	TNA	-0.108 (0.465)	-0.184 (0.433)	0.094 (0.511)	0.226 (0.458)
	NBS	0.747 (0.791)	0.402 (0.540)	0.200 (0.682)	0.226 (0.520)
	WTSA	-1.701 (0.012)	-5.019 (0.001)	0.053 (0.113)	0.266 (0.467)
	All samples	-1.298 (0.069)	-6.223 (0.008)	0.038 (0.169)	0.163 (0.261)
CYTB	TNA	-0.809 (0.263)	-2.868 (0.039)	0.063 (0.274)	0.158 (0.175)
	WTSA	-0.690 (0.215)	-0.593 (0.129)	0.174 (0.137)	0.180 (0.200)
	All samples	-1.334 (0.074)	-5.489 (0.008)	0.044 (0.129)	0.149 (0.164)
Note:	Values in bold font indicates significant values (p < 0.05).
