# Supplementary figures and images for: Genetic variability and population structure of two sympatric cownose rays Rhinoptera (Myliobatiformes, Rhinopteridae) in the Western Atlantic Ocean
Source: PeerJ journal article supplement (doi:10.7717/peerj.17700), 2024-07-15

Figure S1


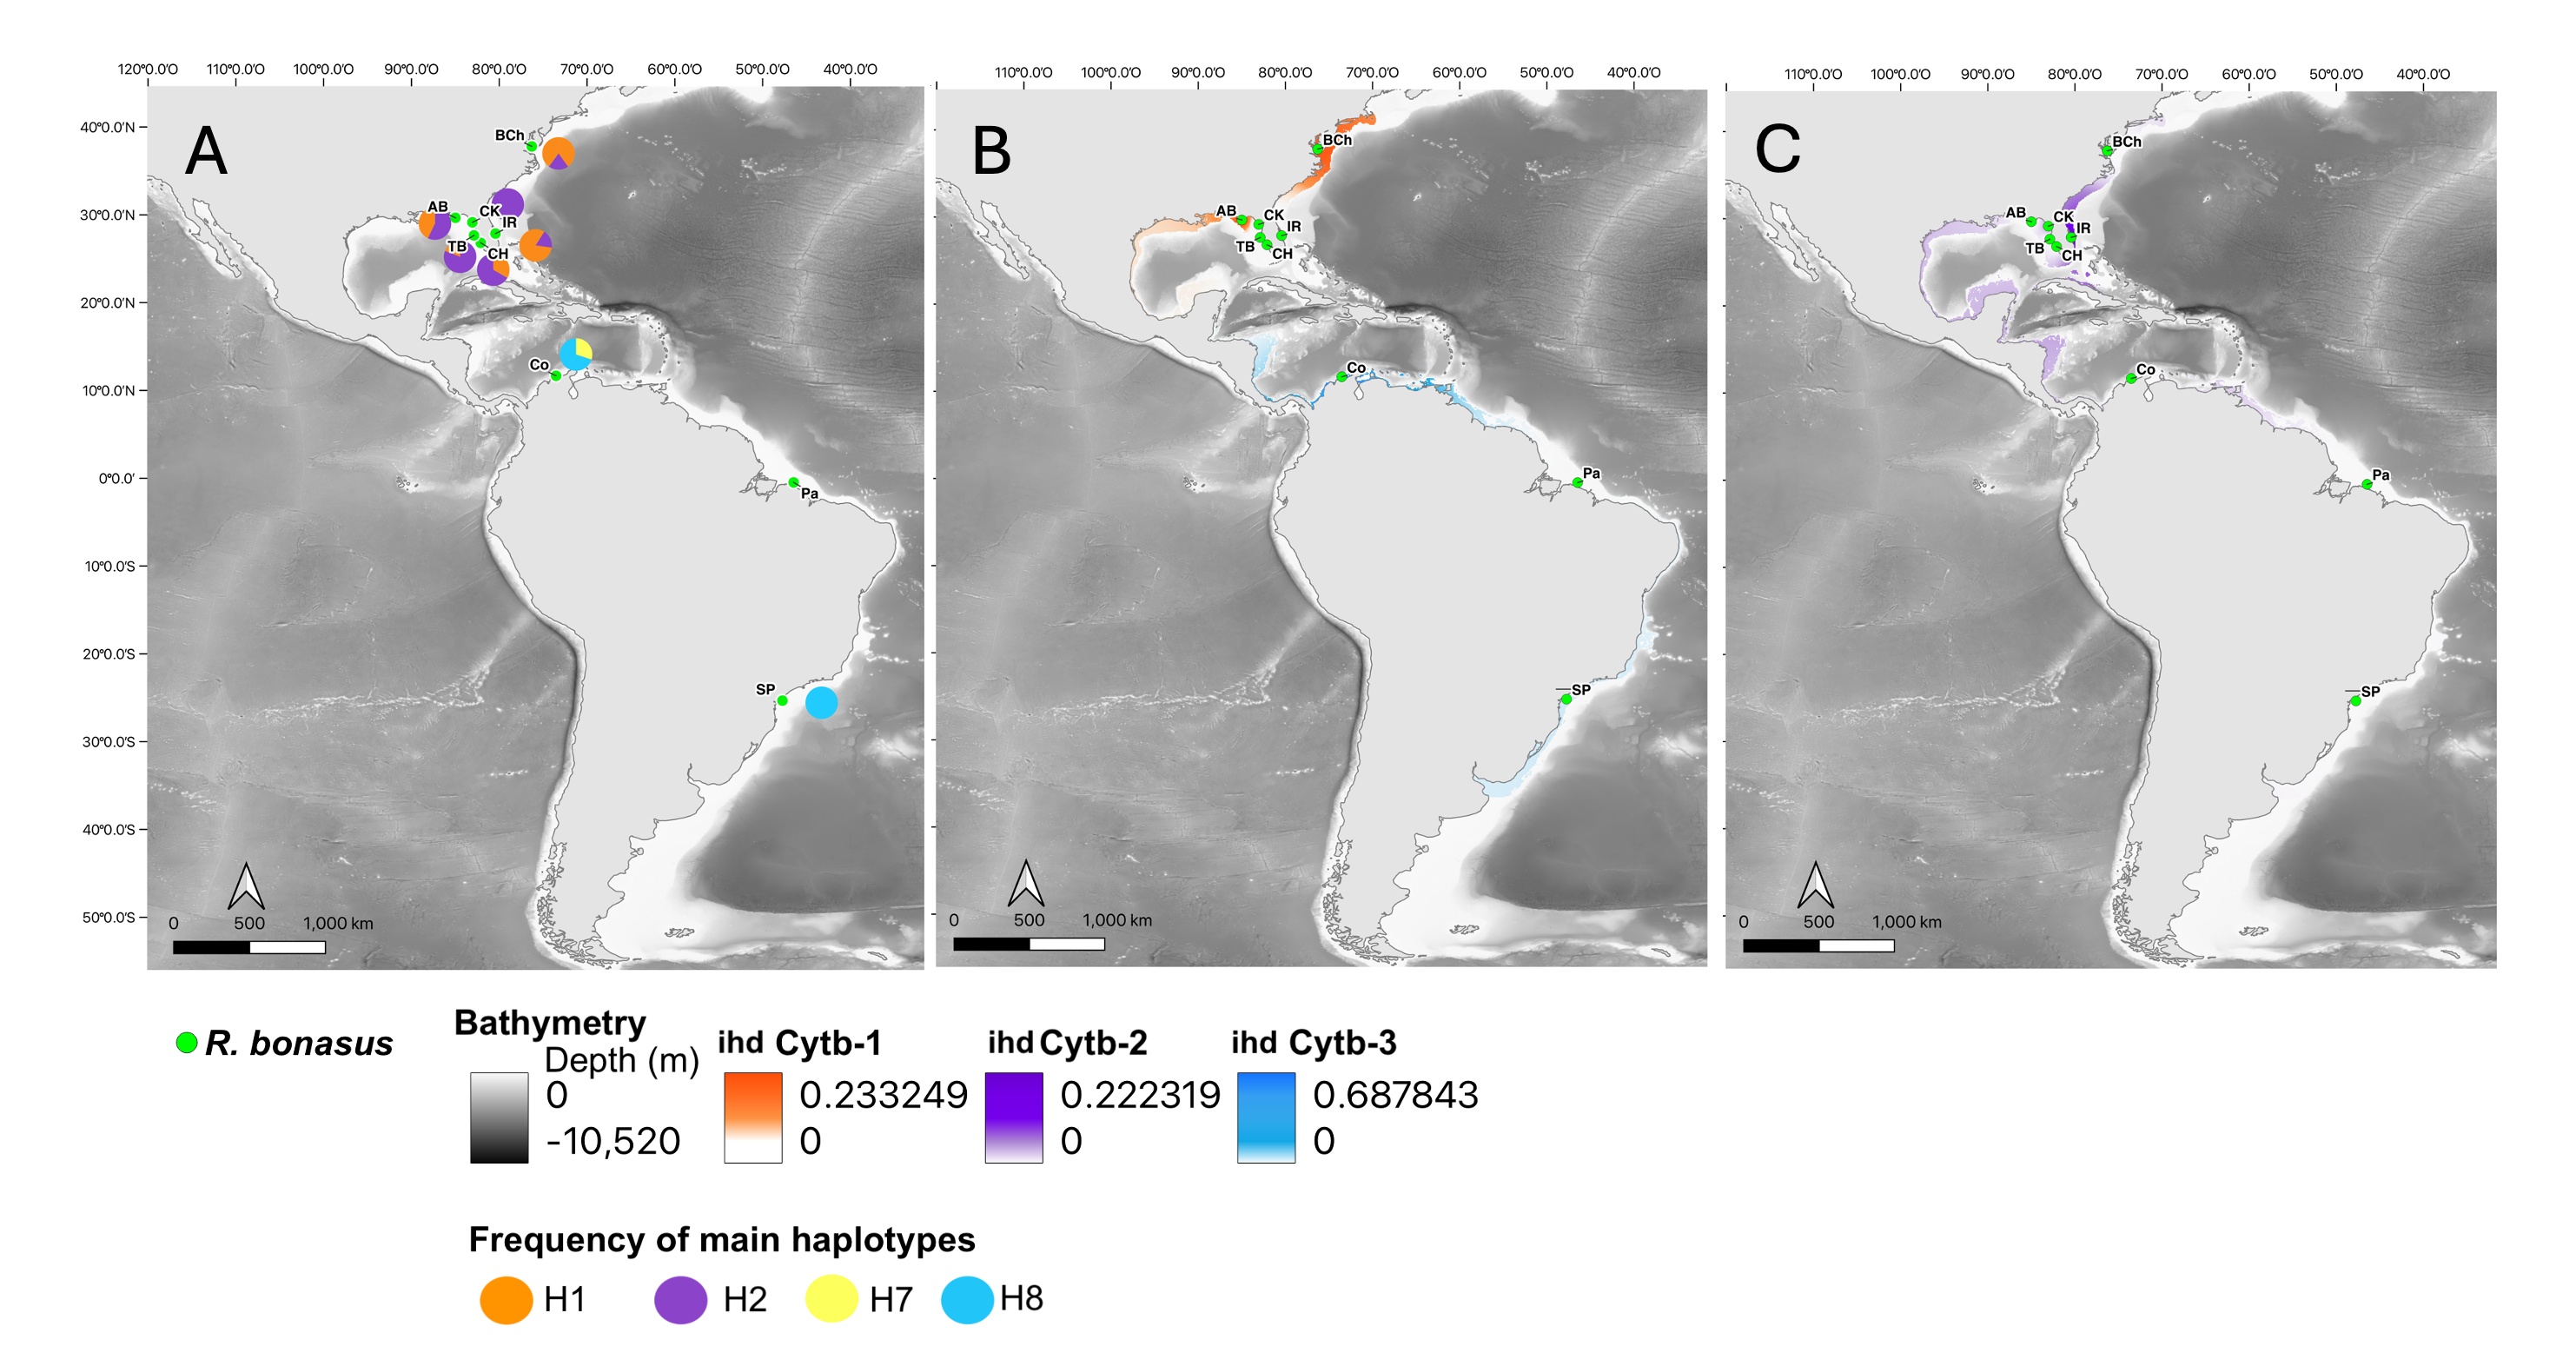

Supplement: Figure_S1.docx [file Figure_S1.docx]

Figure S7


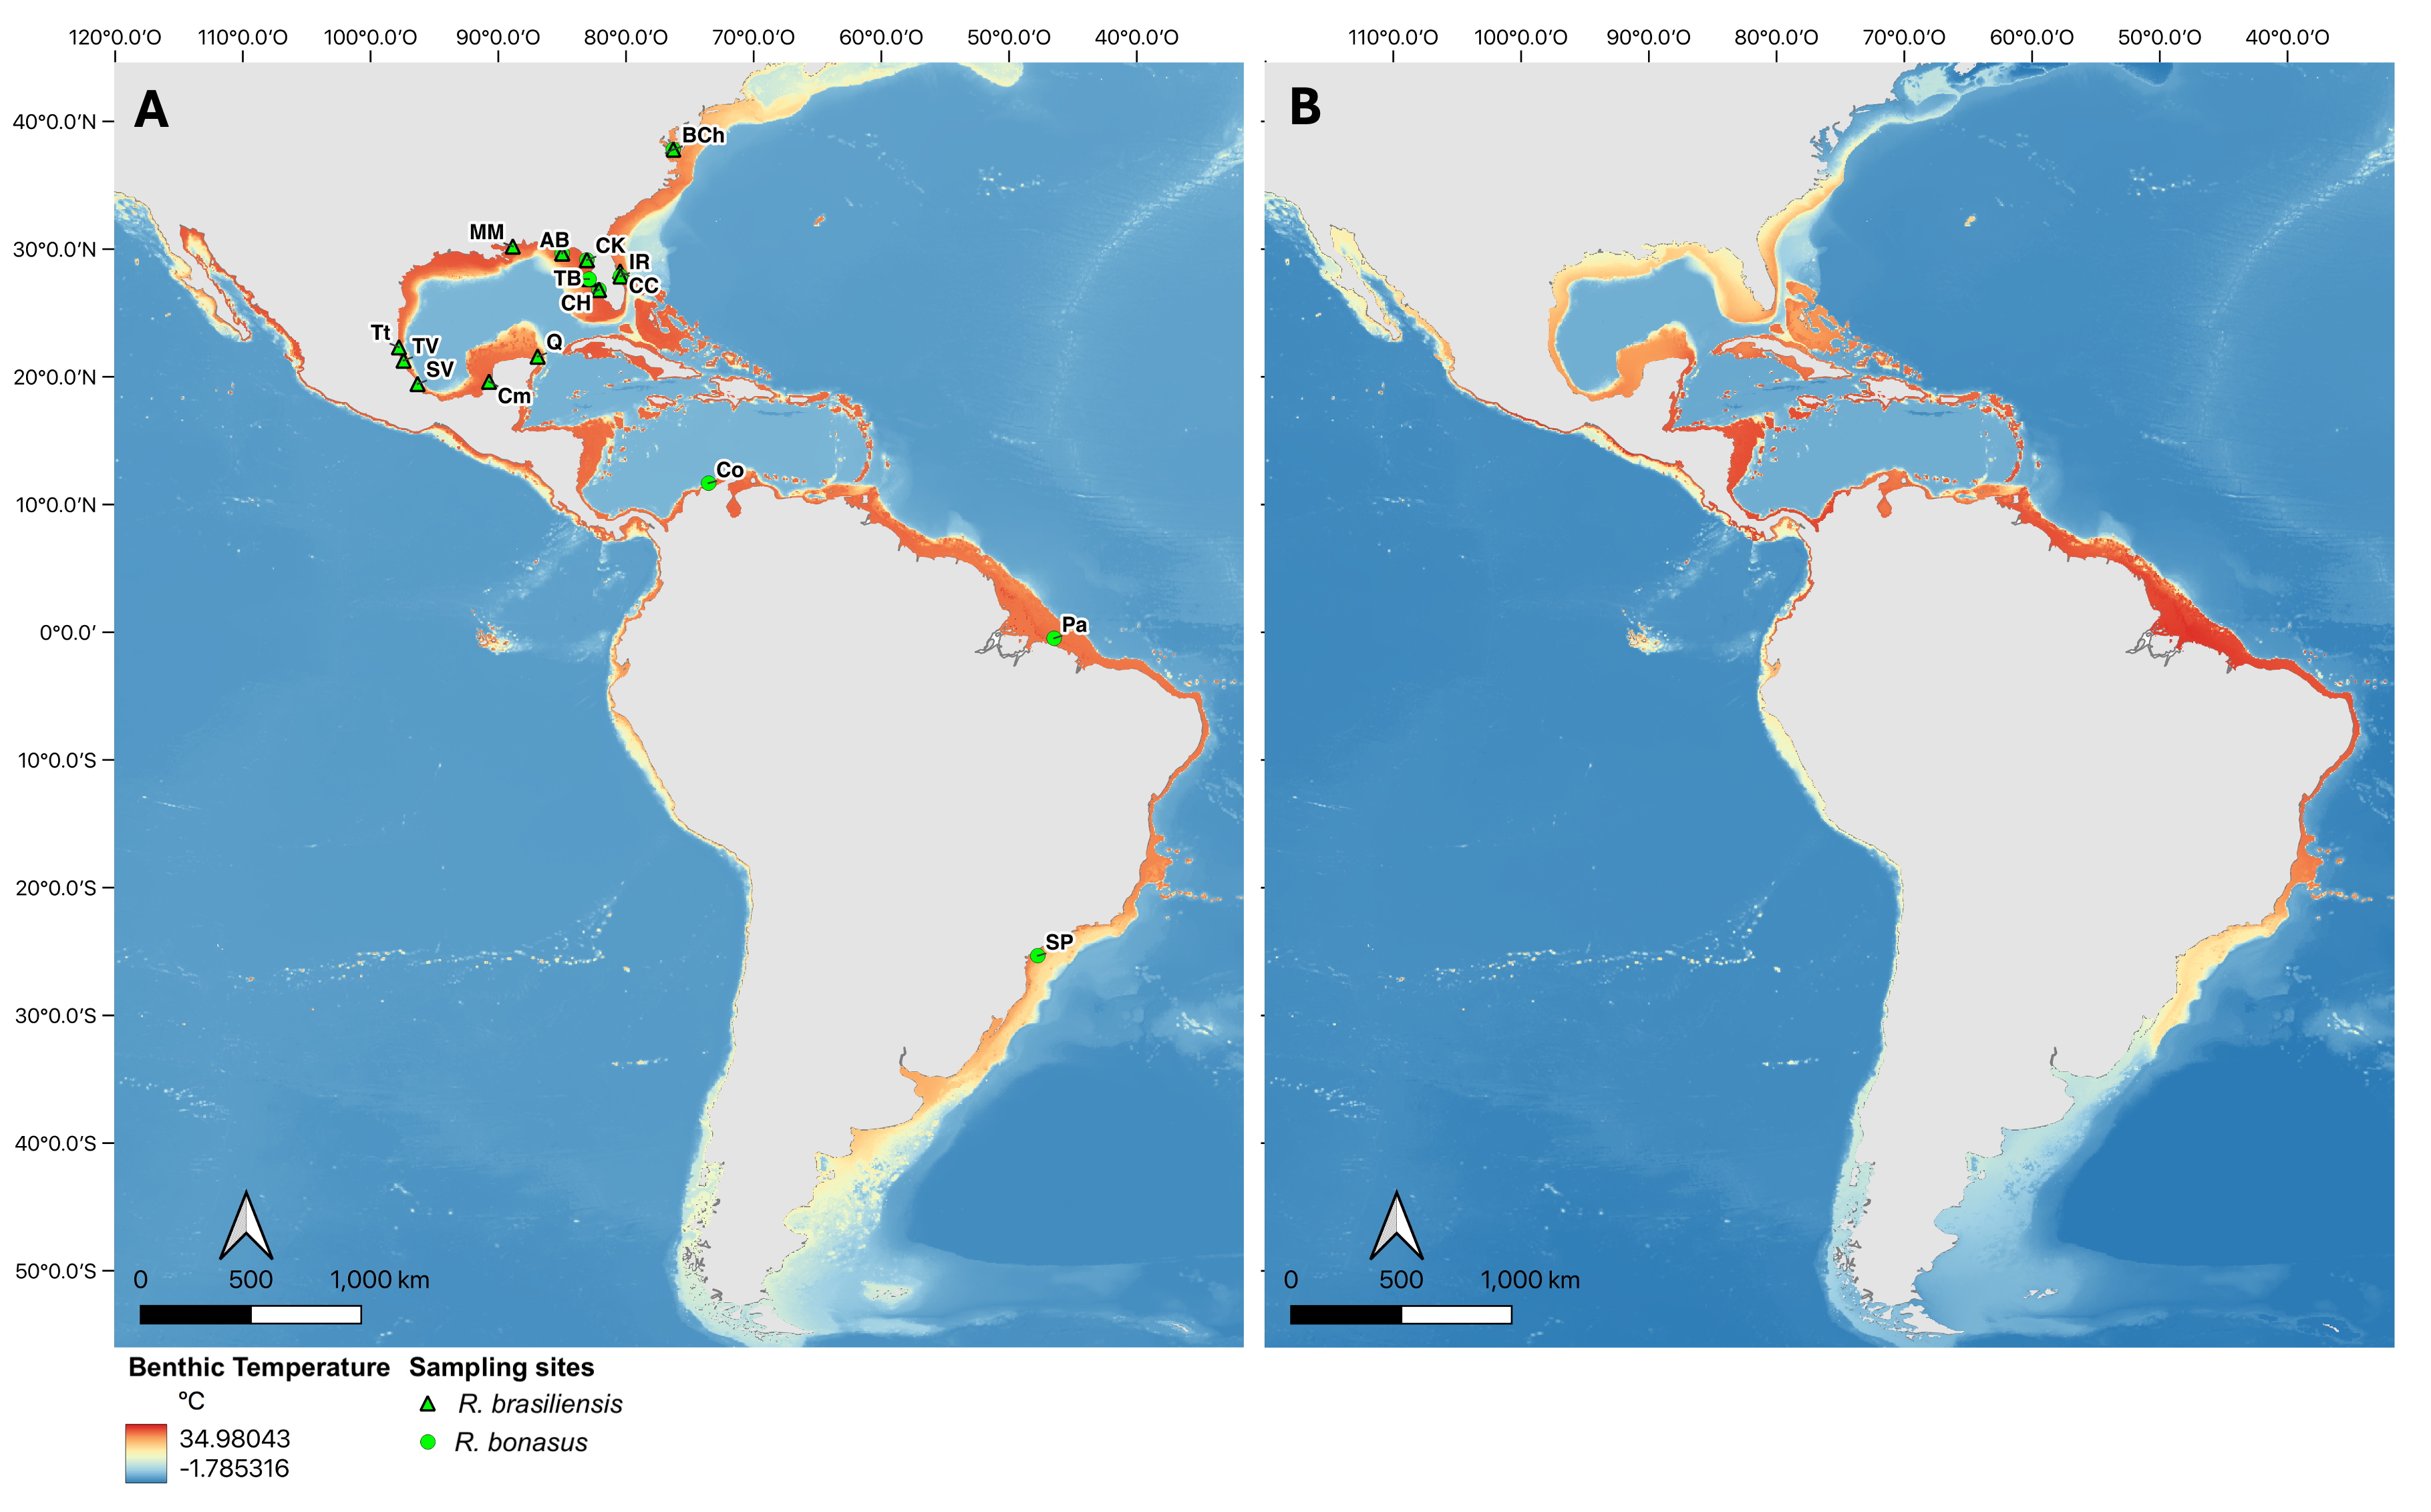

Supplement: Figure_S7.docx [file Figure_S7.docx]

Figure S2


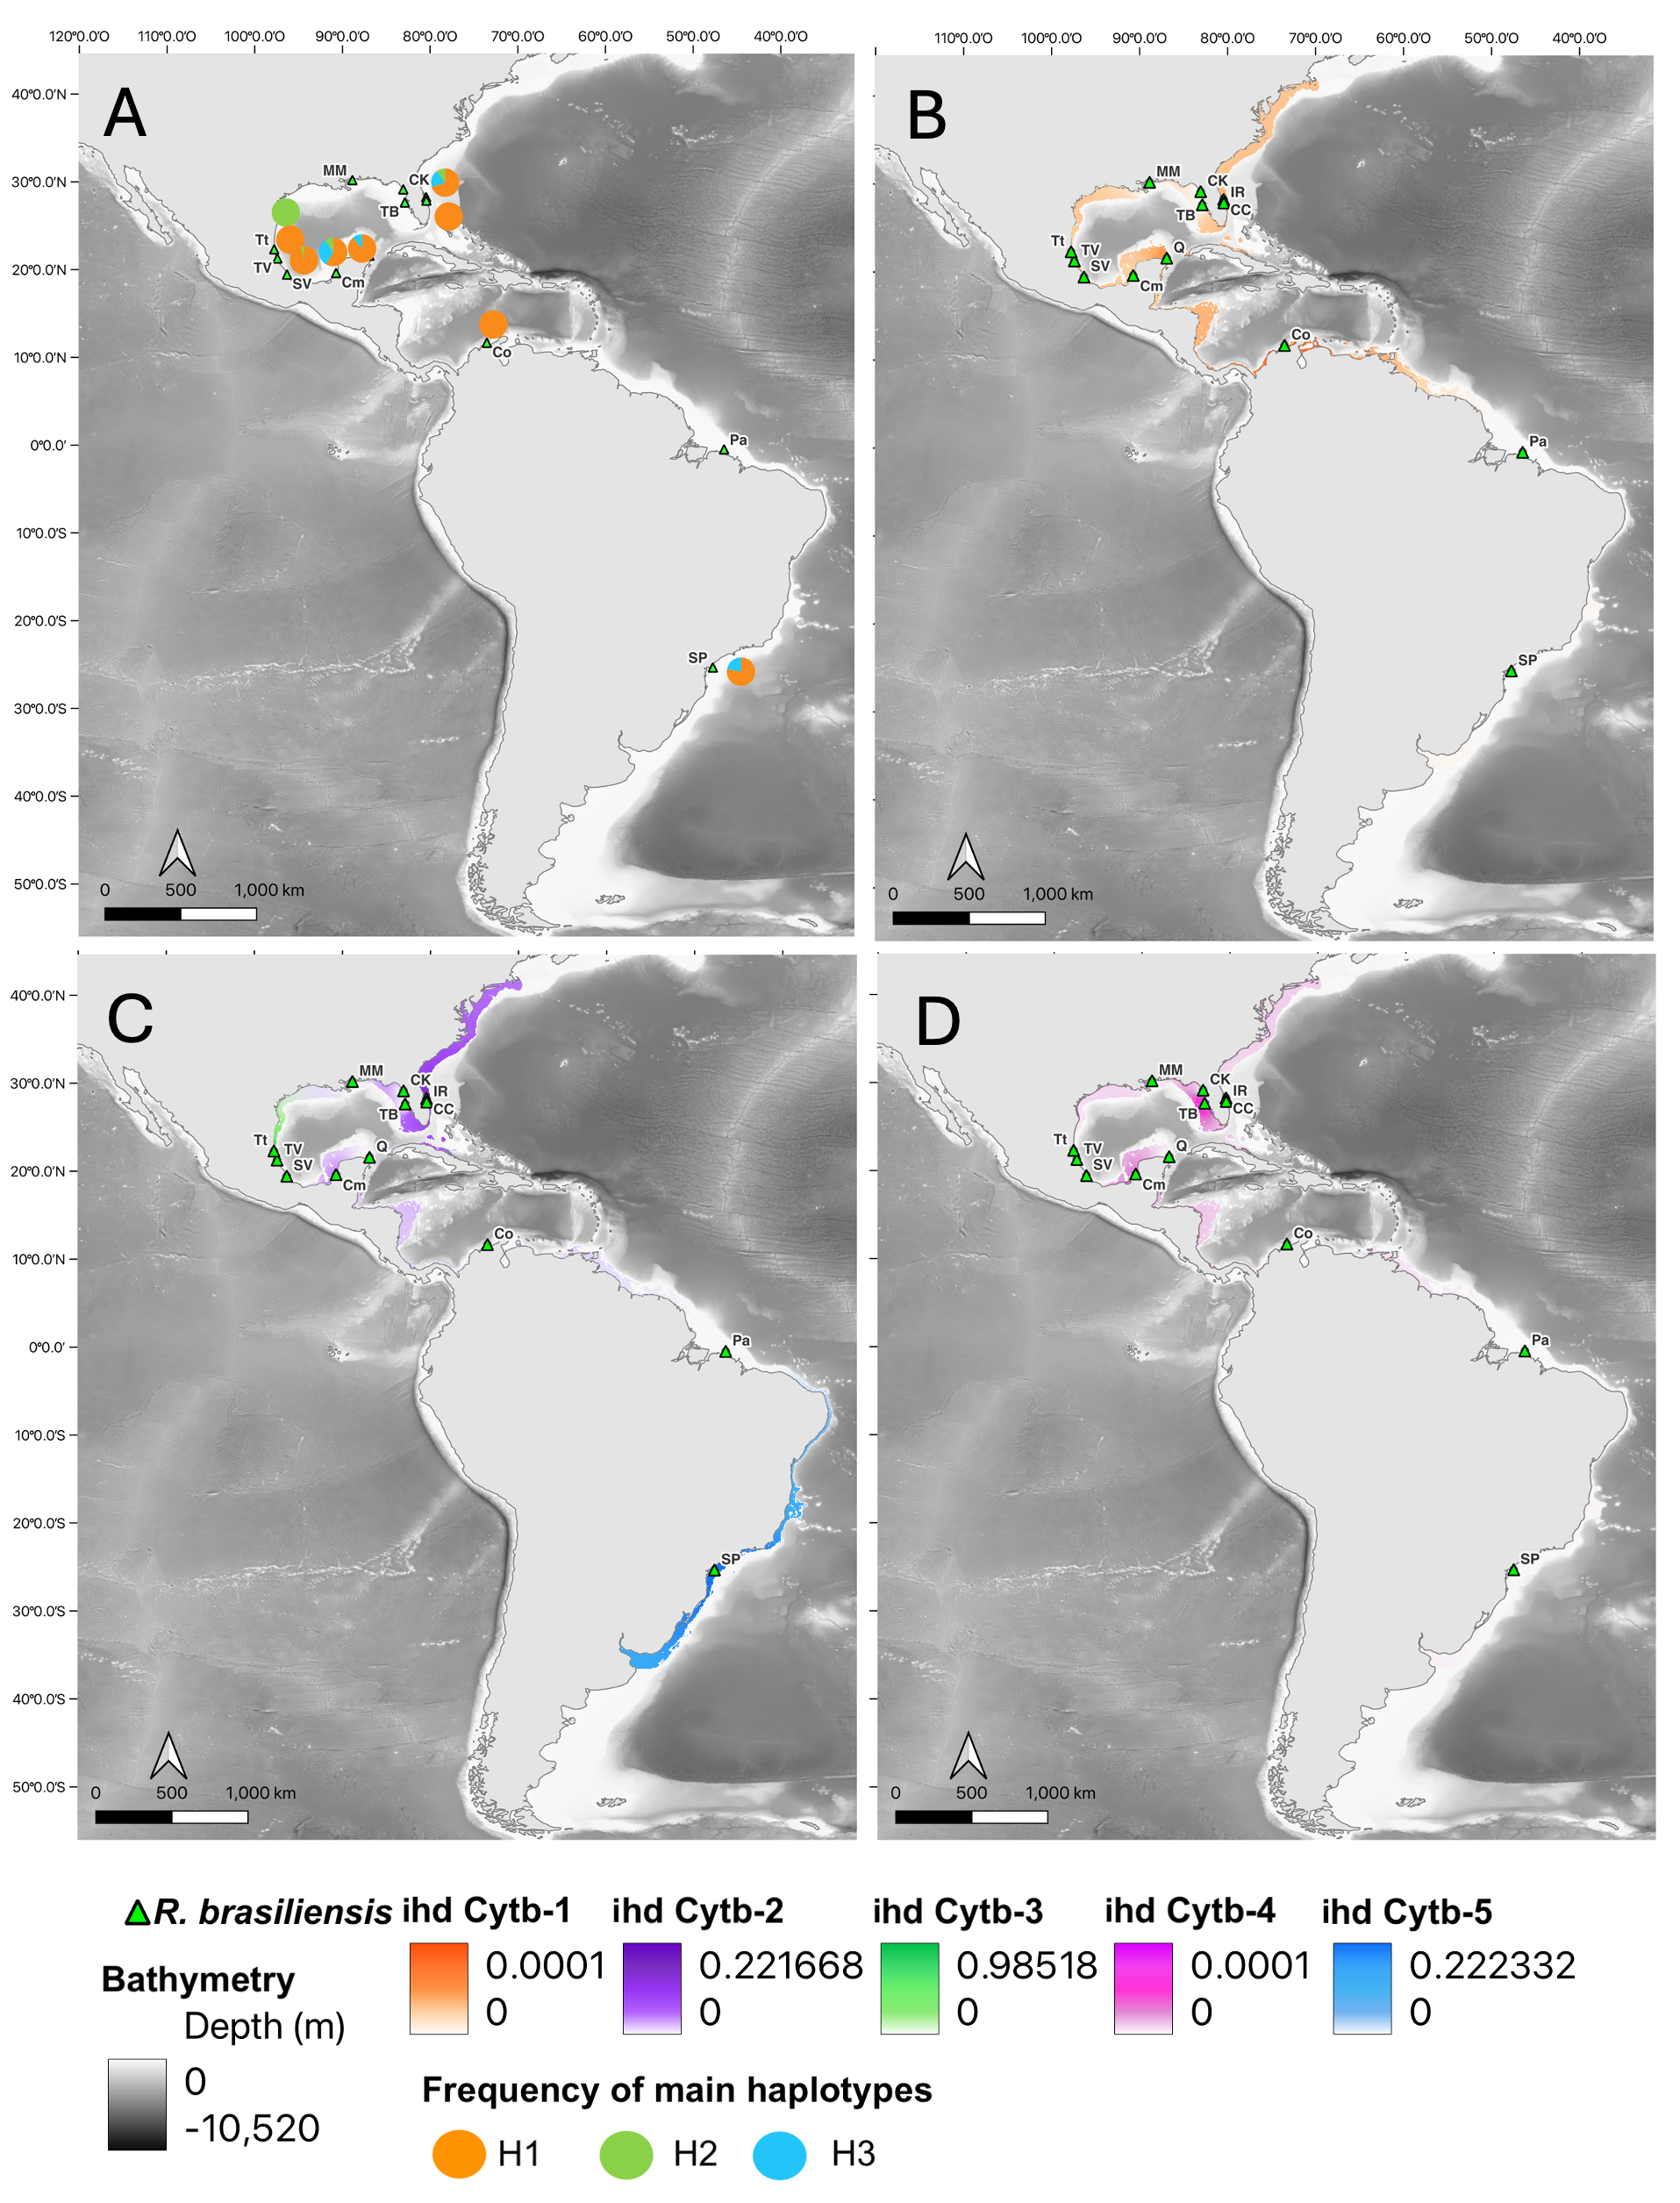

Supplement: Figure_S2.docx [file Figure_S2.docx]

Figure S3


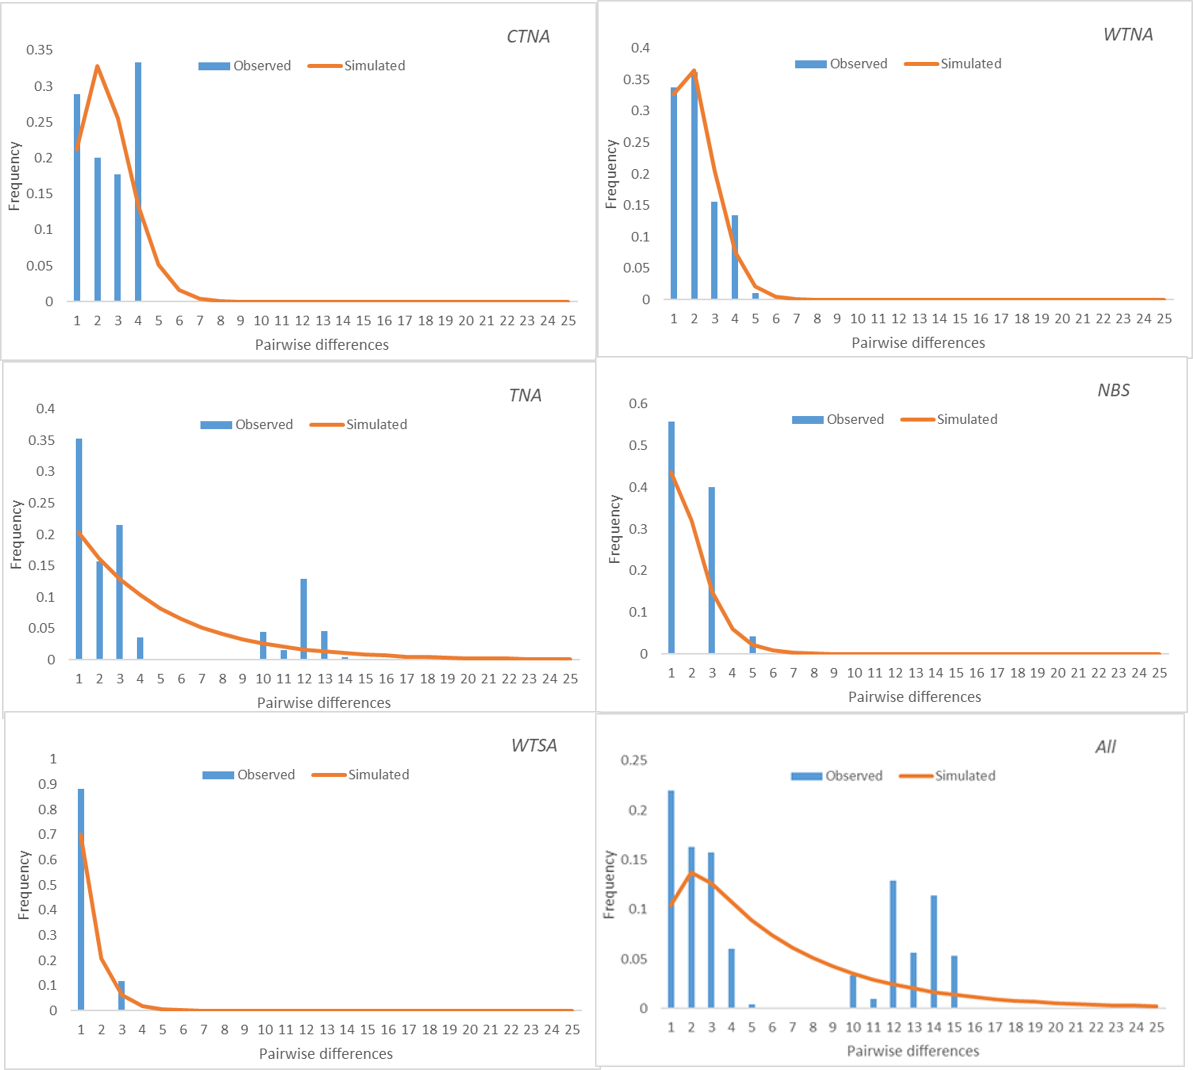

Supplement: Figure_S3.docx [file Figure_S3.docx]

Figure S5


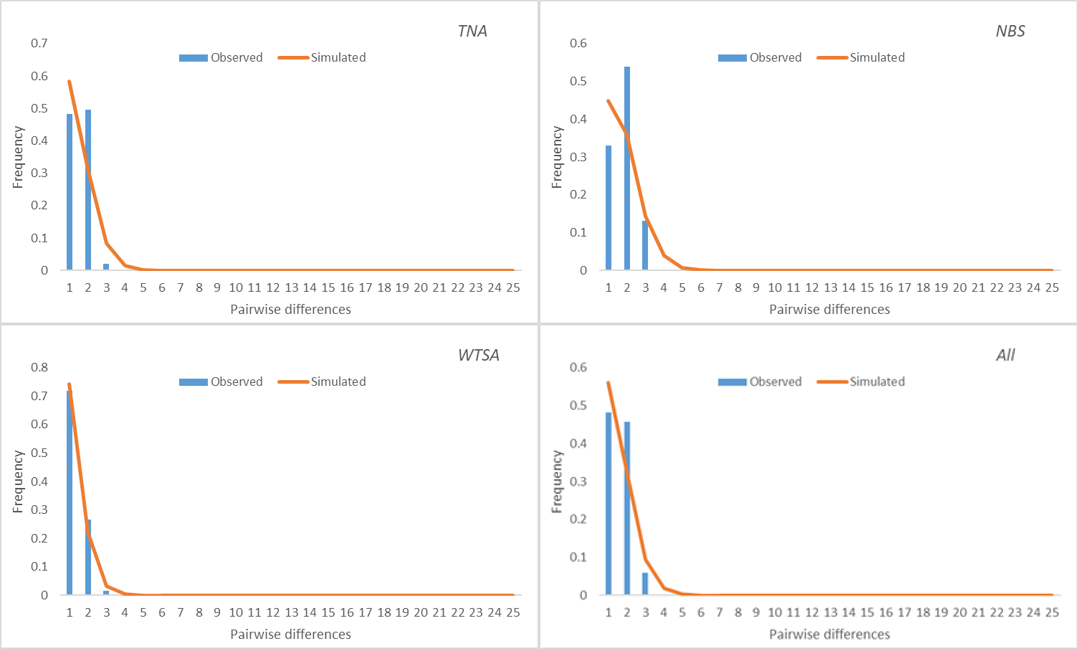

Supplement: Figure_S5.docx [file Figure_S5.docx]

Figure S6


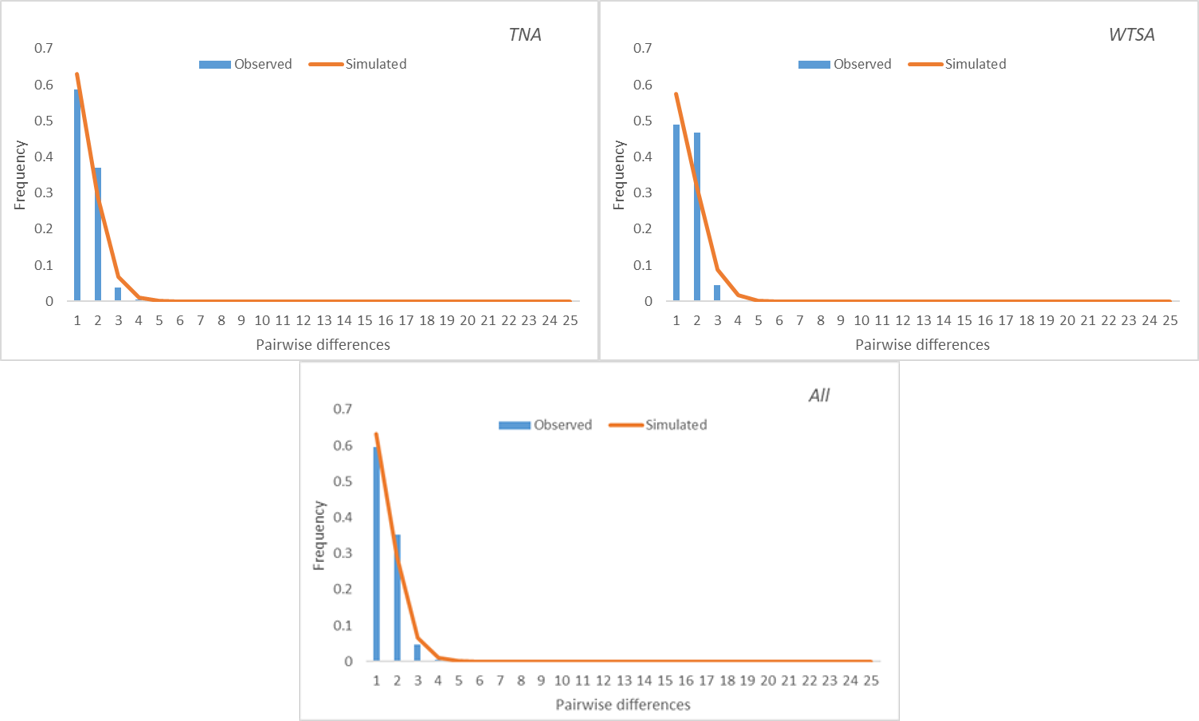

Supplement: Figure_S6.docx [file Figure_S6.docx]

Figure s4


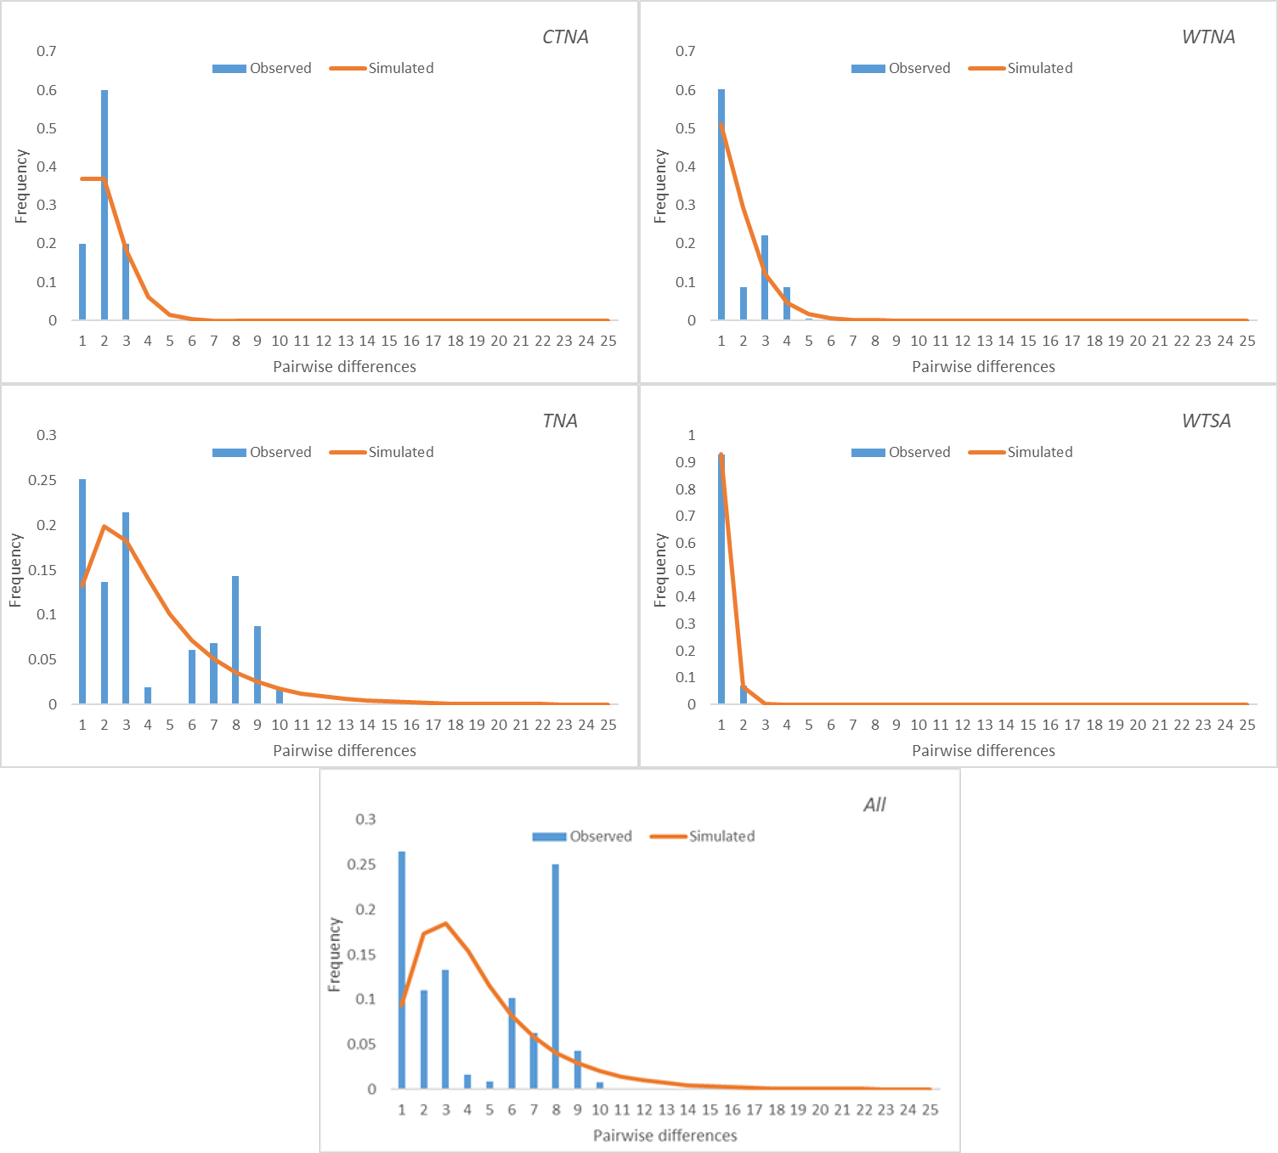

Supplement: Figure_s4.docx [file Figure_s4.docx]
